# Supplementary material
Source: ML conference proceedings conference paper supplement (https://openaccess.thecvf.com/content/ICCV_2019/html/Brachmann_Expert_Sample_Consensus_ICCV_2019_paper.html)
Supplement: Supplementary file 1 [file Brachmann_Expert_Sample_Consensus_ICCV_2019_supplemental.pdf]

Archive with 2 entries (2 files):
- 3443-supp.avi
- 3443-supp.pdf
