# Supplementary material
Source: ML conference proceedings conference paper supplement (https://openaccess.thecvf.com/content/ICCV_2019/html/Brachmann_Expert_Sample_Consensus_ICCV_2019_paper.html)
Supplement: Supplementary file 1 [file Brachmann_Expert_Sample_Consensus_ICCV_2019_supplemental.pdf › 3443-supp.pdf]

# Expert Sample Consensus Applied to Camera Re-Localization –Supplement–

Eric Brachmann and Carsten Rother  
Visual Learning Lab  
Heidelberg University (HCI/IWR)  
<http://vislearn.de>

In this supplementary material, we provide the following, additional information:

- Ablation study on the effect of end-to-end training
- Details about the scene classification performance of Expert Selection and ESAC
- Runtime properties of ESAC including an analysis of conditional computation
- Details about our experiments on large-scale outdoor re-localization

## 1. End-to-End Training

See Fig. 1 for the effect of end-to-end training on the overall accuracy. We initialize the experts by optimizing the  $L_1$  distance to ground truth scene coordinates, and the gating network by optimizing the negative log likelihood classification loss (denoted *Initialization*). We then continue to train the gating network (*E2E Gating*), the experts (*E2E Experts*) or the entire ensemble (*E2E All*) using the ESAC objective. End-to-end training of each component increases the average accuracy, and we achieve best accuracy when we train the entire ensemble jointly. The effect of end-to-end training is significant but not large using the common acceptance threshold of 5cm and 5°. However, lowering the threshold to 2cm and 2° reveals a large improvement in accuracy of > 10%. End-to-end training improves foremost the precision of re-localization, and less so the re-localization rate under a coarse threshold.

## 2. Scene Classification

In Fig. 2, we show the scene confusion matrices of our ensemble trained with Expert Selection and ESAC. The database contains multiple offices which look similar due to ambiguous office equipment, see Fig. 3 for examples. Expert Selection chooses a scene according to the prediction of the gating network, which is error prone. ESAC considers multiple experts in ambiguous cases, and chooses the final estimate according to geometric consistency.

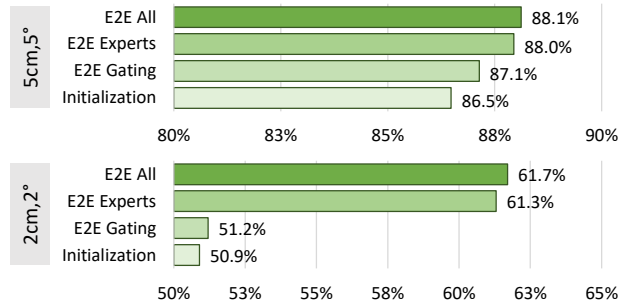

Figure 1. **Effect of End-to-End Training.** Average re-localization accuracy of ESAC for 19Scenes when we train the entire ensemble of networks or parts of it end-to-end. **Top:** Acceptance threshold of 5cm and 5°. **Bottom:** 2cm and 2°.

## 3. Runtime Properties

ESAC needs only to evaluate experts with non-zero probability assigned to them by the gating network. For 19Scenes, ESAC evaluates 6.1 experts in 555ms on average. Furthermore, we can restrict the maximum number of experts per image, see Fig. 4. For example, using at most the top 2 experts per test image, we gain +19.7% accuracy over Expert Selection with just a minor increase in computation time. At the other end of the spectrum, we could always evaluate all experts and choose the best hypothesis according to sample consensus, see *Uniform Gating* in Fig. 4. This achieves good accuracy but is computationally intensive. ESAC shows slightly higher accuracy and is much faster. Also, ESAC almost reaches the accuracy of *Oracle Gating* which always selects the correct expert via the ground truth scene ID.

## 4. Large-Scale Outdoor Re-Localization

We provide details regarding our experiments on large-scale outdoor re-localization. We apply ESAC to two large outdoor re-localization datasets, namely Dubrovnik [2] and Aachen Day [4].

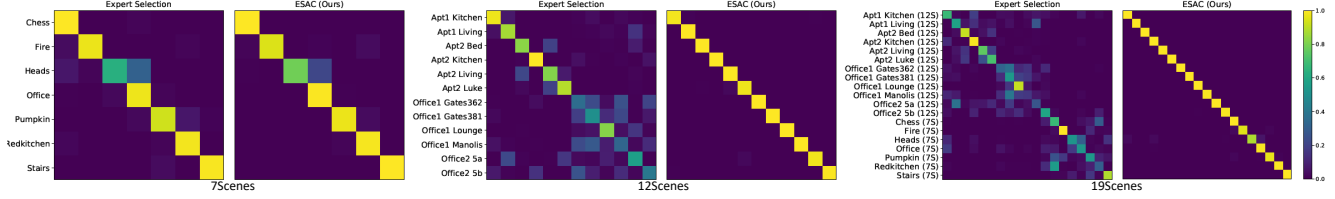

Figure 2. **Scene Confusion.** We compare confusion matrices of Expert Selection and ESAC for 7Scenes, 12Scenes and 19Scenes. The Y-axis shows the true scene, the X-axis shows the estimated scene. The scene ordering on the X-axis (from left to right) follows the Y-axis (from top to bottom). For 19Scenes, we mark scenes originating from 12Scenes with *12S* and scenes originating from 7Scenes with *7S*.

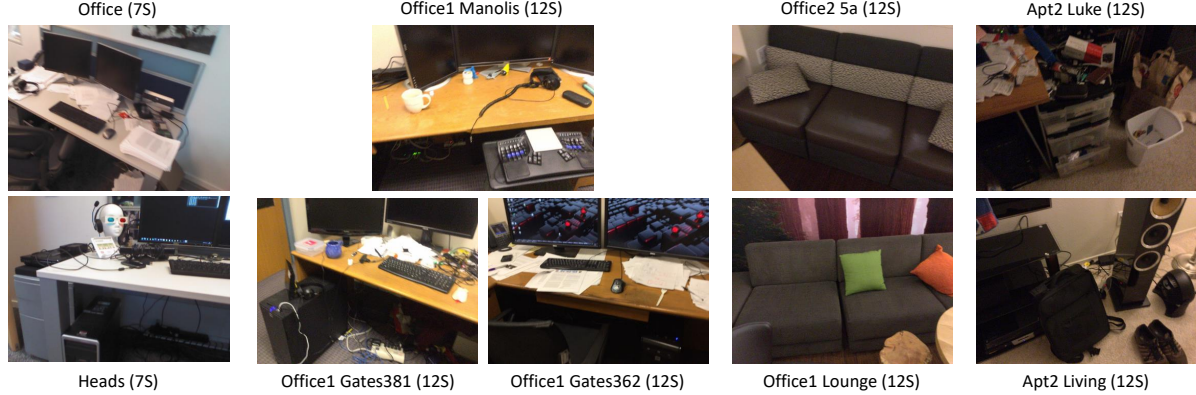

Figure 3. **Ambiguous Scenes.** We show test frames of scenes that Expert Selection confuses often (cf. Fig. 2). We mark scenes originating from 12Scenes with *12S* and scenes originating from 7Scenes with *7S*.

|                  | Max. Experts | Avg. Experts | Accuracy | Avg. Time (ms) |
|------------------|--------------|--------------|----------|----------------|
| DSAC++ [1]       | -            | -            | 53.3%    | 940            |
| Expert Selection | 1            | 1            | 47.5%    | 307            |
| ESAC (Ours)      | 1            | 1            | 49.9%    | 276            |
|                  | 2            | 2            | 67.2%    | 343            |
|                  | 3            | 2.9          | 75.3%    | 398            |
|                  | 19           | 6.1          | 88.1%    | 555            |
| Uniform Gating   | 19           | 19           | 87.8%    | 1,377          |
| Oracle Gating    | 1            | 1            | 89.0%    | 120            |

Figure 4. **Accuracy vs. Speed on 19Scenes.** We measure the average processing time for an image on a single Tesla K80 GPU including reading data. For ESAC, we can limit the maximum number of top ranked experts evaluated for a test image.

**Datasets.** The Dubrovnik dataset is comprised of ca. 6k holiday photographs taken in the old town of Dubrovnik. Stemming from online photo collections, the images were recorded with different cameras, and feature a multitude of different focal lengths, resolutions and aspect ratios. The Aachen Day dataset is comprised of ca. 4.5k images taken in Aachen, Germany. Training and test images were recorded using two separate but comparable camera types. The full Aachen dataset also comes with a small collection of difficult night time query images (*Aachen Night*) which we omit here. There is no night time training data, and

bridging the resulting domain gap is out of scope of ESAC. **ESAC Training.** Both datasets represent large connected areas. For initializing the gating network and scene coordinate experts, we divide each area into clusters via kMeans, see Fig. 5 a) for an example. As input for clustering, we use the median scene coordinate (median per dimension) for each training image. To avoid quantization effects at the cluster borders during initialization, we use the following soft assignment of training images to experts. We express the probability  $p_e(I)$  of training image  $I$  belonging to the cluster of expert  $e$  via a similarity measure  $S(I, e)$ :

$$p_e(I) = \frac{S(I, e)}{\sum_{e'} S(I, e')}. \quad (1)$$

We define this similarity in terms of the distance between the mean scene coordinate of image  $I$ , denoted  $\bar{\mathbf{y}}_I$ , and the cluster center  $\mathbf{c}_e$ :

$$S(I, e) = \frac{1}{2\pi\sigma_e} \exp \frac{-\gamma \|\bar{\mathbf{y}}_I - \mathbf{c}_e\|_2}{2\sigma_e}, \quad (2)$$

where  $\sigma_e$  is an estimate of the cluster size, and  $\gamma$  controls the softness of the similarity. We use  $\gamma = 5$ , and the mean squared distance of all images (resp. their median scene coordinates) within a cluster to the cluster center as  $\sigma_e$ . When initializing the gating network, we minimize the KL-divergence of gating predictions  $g(e, I, \mathbf{w})$  and probabilities

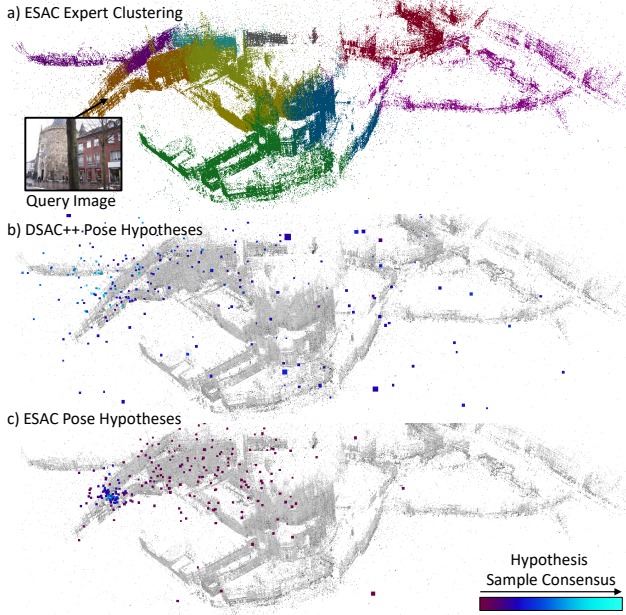

Figure 5. **Qualitative Result on Aachen.** **a)** Clustering of the Aachen dataset used to initialize ESAC with  $M = 10$  experts. **b)** Positions of hypotheses drawn by DSAC++ for the query image shown in a). Hypothesis sample consensus (hypothesis score) is indicated by color, normalized over all hypotheses. **c)** Positions of hypotheses drawn by ESAC. Contrary to DSAC++, hypotheses form a clear cluster at the true position of the query image.

$p_e(I)$ . When initializing an expert network  $e$ , we randomly choose training images according to  $p_e(I)$  and minimize the  $L_1$  distance w.r.t. ground truth scene coordinates for 1M iterations. We obtain ground truth scene coordinates by rendering the sparse SfM reconstruction using the ground truth pose for image  $I$ . Since ground truth scene coordinates are sparse, we optimize the re-projection error of the dense scene coordinate prediction for another 1M iterations, hence following the two-stage initialization of DSAC++ [1]. Finally, we train the entire ensemble jointly and end-to-end for 50k iterations using the ESAC objective. To support generalization to different camera types and lighting conditions, we convert all images to grayscale, and randomly change brightness and contrast during training in the range of 50-110% and 80-120%, respectively.

**Discussion of Results.** As stated in the main paper, ESAC demonstrates largely improved accuracy on both outdoor datasets compared to DSAC++ [1], see Fig. 5 for an qualitative example. However, it does not yet reach the accuracy of ActiveSearch [3], a classic sparse feature-based re-localization method. Especially on Dubrovnik, ESAC stays far behind, even when using a substantial amount of  $M = 50$  experts.

Upon closer inspection, we find that the structure of these datasets potentially contributes to the exceptional per-

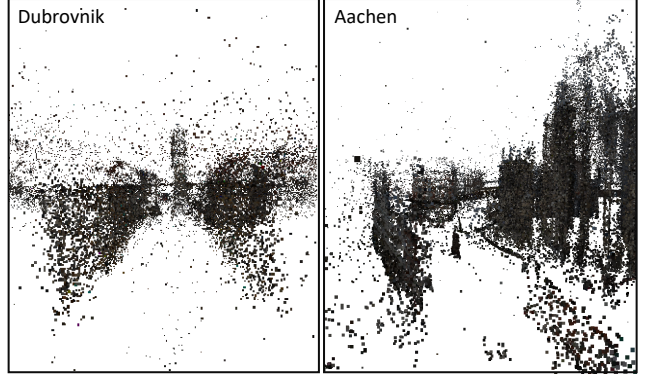

Figure 6. **Ground Truth SfM Reconstructions.** Both datasets contain outlier 3D points in the ground truth reconstruction. The outlier ratio is substantial for Dubrovnik, and still noticeable for Aachen.

formance of ActiveSearch. Both datasets come with a 3D model of the environment and ground truth training poses created by running a sparse feature-based structure-from-motion reconstruction tool on all images (training and test). Images which are challenging for feature-based approaches (*i.e.* images with little structure or motion blur) are naturally not part of these datasets, since they are filtered at the reconstruction stage. It might be problematic to compare learning-based approaches to classical feature-based methods on datasets, where the ground truth was generated with feature-based reconstruction tools.

Furthermore, the reconstructions are not perfect as they contain a substantial amount of outlier points, see Fig. 6 for an illustration. ActiveSearch operates directly on top of this reconstruction, and applies sophisticated outlier rejection schemas. In contrast, scene coordinate regression methods like ESAC try to build geometrically consistent internal representations of a map, encoded in the network weights. Having visually similar image patches associated with very different ground truth scene coordinates (due to outliers) might result in severe overfitting of the network, which tries to tell patches apart that actually show the same location. The poor accuracy of ESAC on Dubrovnik compared to Aachen supports this interpretation, as the re-localization accuracy corresponds well to the general reconstruction quality of both datasets. At the same time, the question arises how meaningful the reported  $\approx 1m$  re-localization accuracy for ActiveSearch on the Dubrovnik dataset is, given the ground truth quality. Note that geometry, training poses and test poses were all jointly optimized during the SfM reconstruction. Inaccuracies in the geometry might therefore hint towards limited accuracy of the ground truth poses.

## References

- [1] Eric Brachmann and Carsten Rother. Learning less is more-6D camera localization via 3D surface regression. In *CVPR*, 2018. 3
- [2] Yunpeng Li, Noah Snavely, and Daniel P. Huttenlocher. Location recognition using prioritized feature matching. In *ECCV*, 2010. 1
- [3] Torsten Sattler, Bastian Leibe, and Leif Kobbelt. Efficient & effective prioritized matching for large-scale image-based localization. *TPAMI*, 2016. 3
- [4] Torsten Sattler, Will Maddern, Carl Toft, Akihiko Torii, Lars Hammarstrand, Erik Stenborg, Daniel Safari, Masatoshi Okutomi, Marc Pollefeys, Josef Sivic, Fredrik Kahl, and Tomas Pajdla. Benchmarking 6DoF outdoor visual localization in changing conditions. In *CVPR*, 2018. 1
